# Supplementary material for: A Bicyclic Diterpenoid with a New 15,16-Dinorlabdane Carbon Skeleton from Leonurus japonicus and Its Coagulant Bioactivity
Source: MDPI journal article supplement (doi:10.3390/molecules181113904), 2013-11-11

# Supplemental Materials

## List of Contents

| No. | Content                                                                                                             | Page |
|-----|---------------------------------------------------------------------------------------------------------------------|------|
| 1   | <b>Figure S1.</b> The IR Spectrum of Compound <b>1</b>                                                              | S2   |
| 2   | <b>Figure S2.</b> The (+)-HRESIMS Spectroscopic Data of Compound <b>1</b>                                           | S3   |
| 3   | <b>Figure S3.</b> The $^1\text{H}$ -NMR Spectrum of Compound <b>1</b> in $\text{Me}_2\text{CO}-d_6$                 | S4   |
| 4   | <b>Figure S4.</b> The $^{13}\text{C}$ -NMR Spectrum of Compound <b>1</b> in $\text{Me}_2\text{CO}-d_6$              | S5   |
| 5   | <b>Figure S5.</b> The DEPT Spectrum of Compound <b>1</b> in $\text{Me}_2\text{CO}-d_6$                              | S6   |
| 6   | <b>Figure S6.</b> The gHSQC Spectrum of Compound <b>1</b> in $\text{Me}_2\text{CO}-d_6$                             | S7   |
| 7   | <b>Figure S7.</b> The $^1\text{H}$ - $^1\text{H}$ gCOSY Spectrum of Compound <b>1</b> in $\text{Me}_2\text{CO}-d_6$ | S8   |
| 8   | <b>Figure S8.</b> The HMBC Spectrum of Compound <b>1</b> in $\text{Me}_2\text{CO}-d_6$                              | S9   |
| 9   | <b>Figure S9.</b> The NOESY Spectrum of Compound <b>1</b> in $\text{Me}_2\text{CO}-d_6$                             | S10  |

Figure S1. The IR Spectrum of Compound 1.

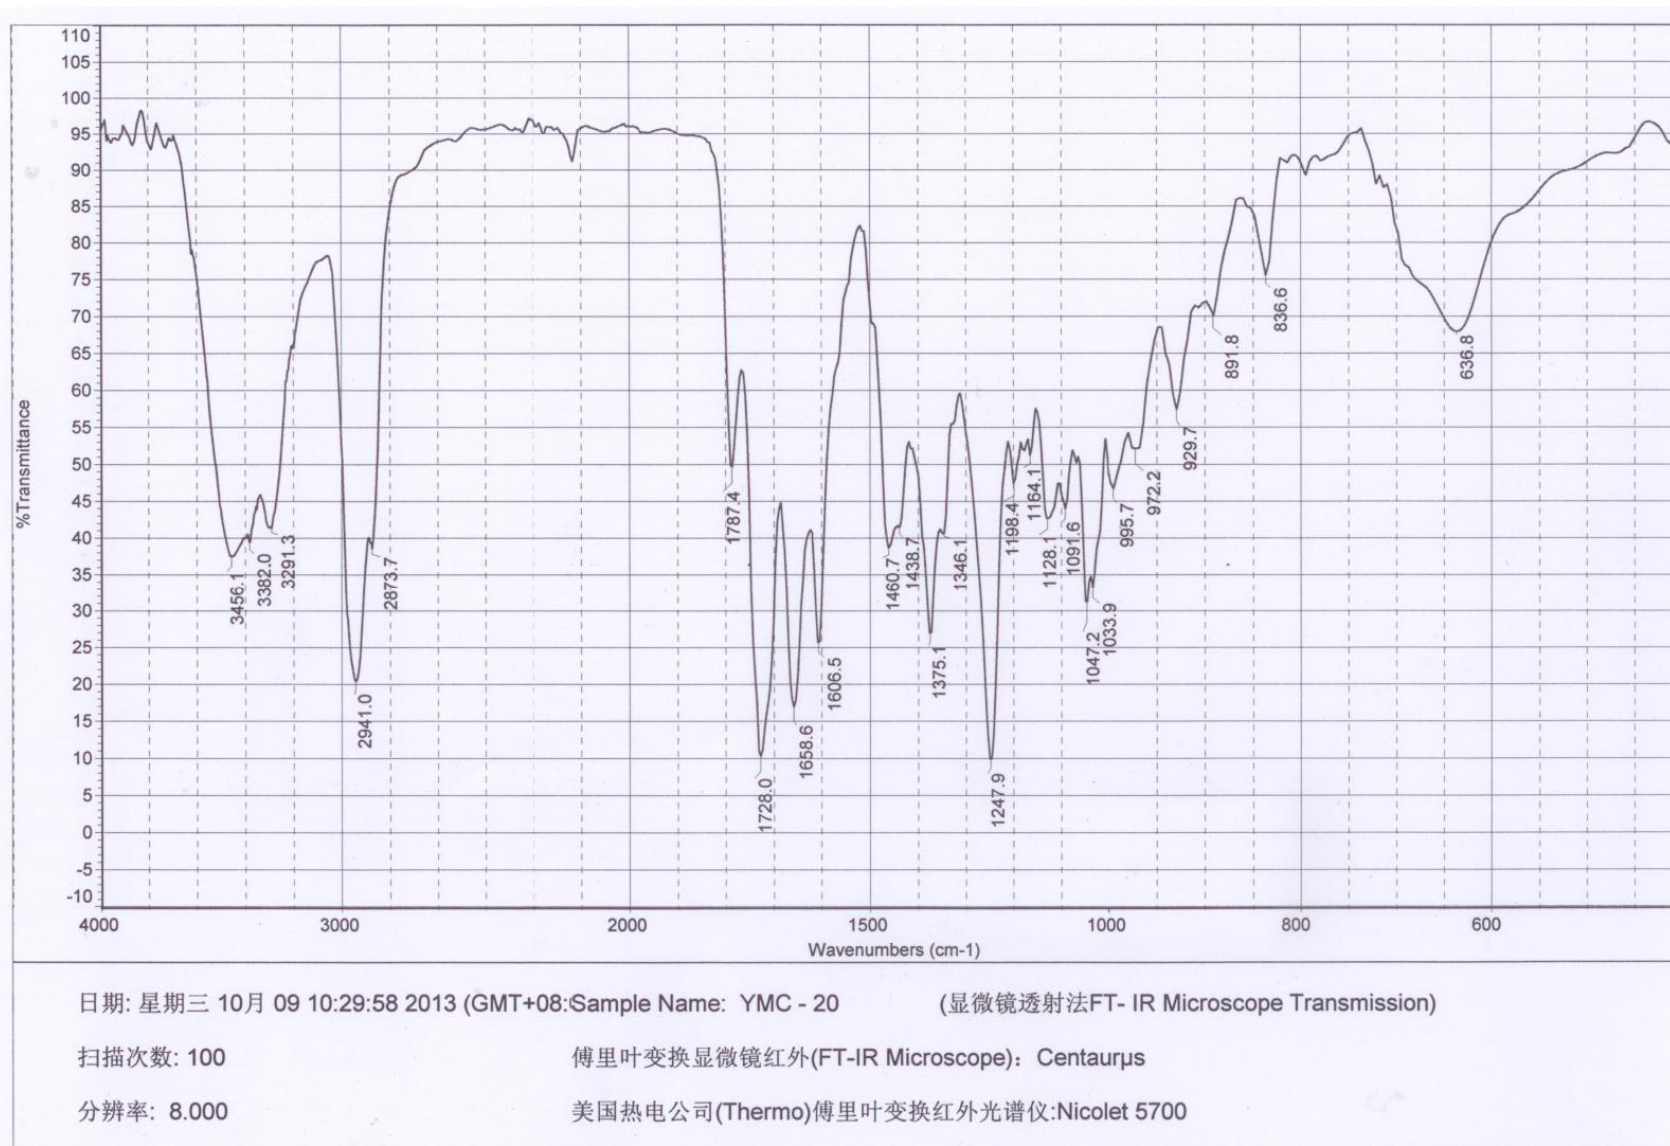

**Figure S2.** The (+)-HRESIMS Spectroscopic Data of Compound 1.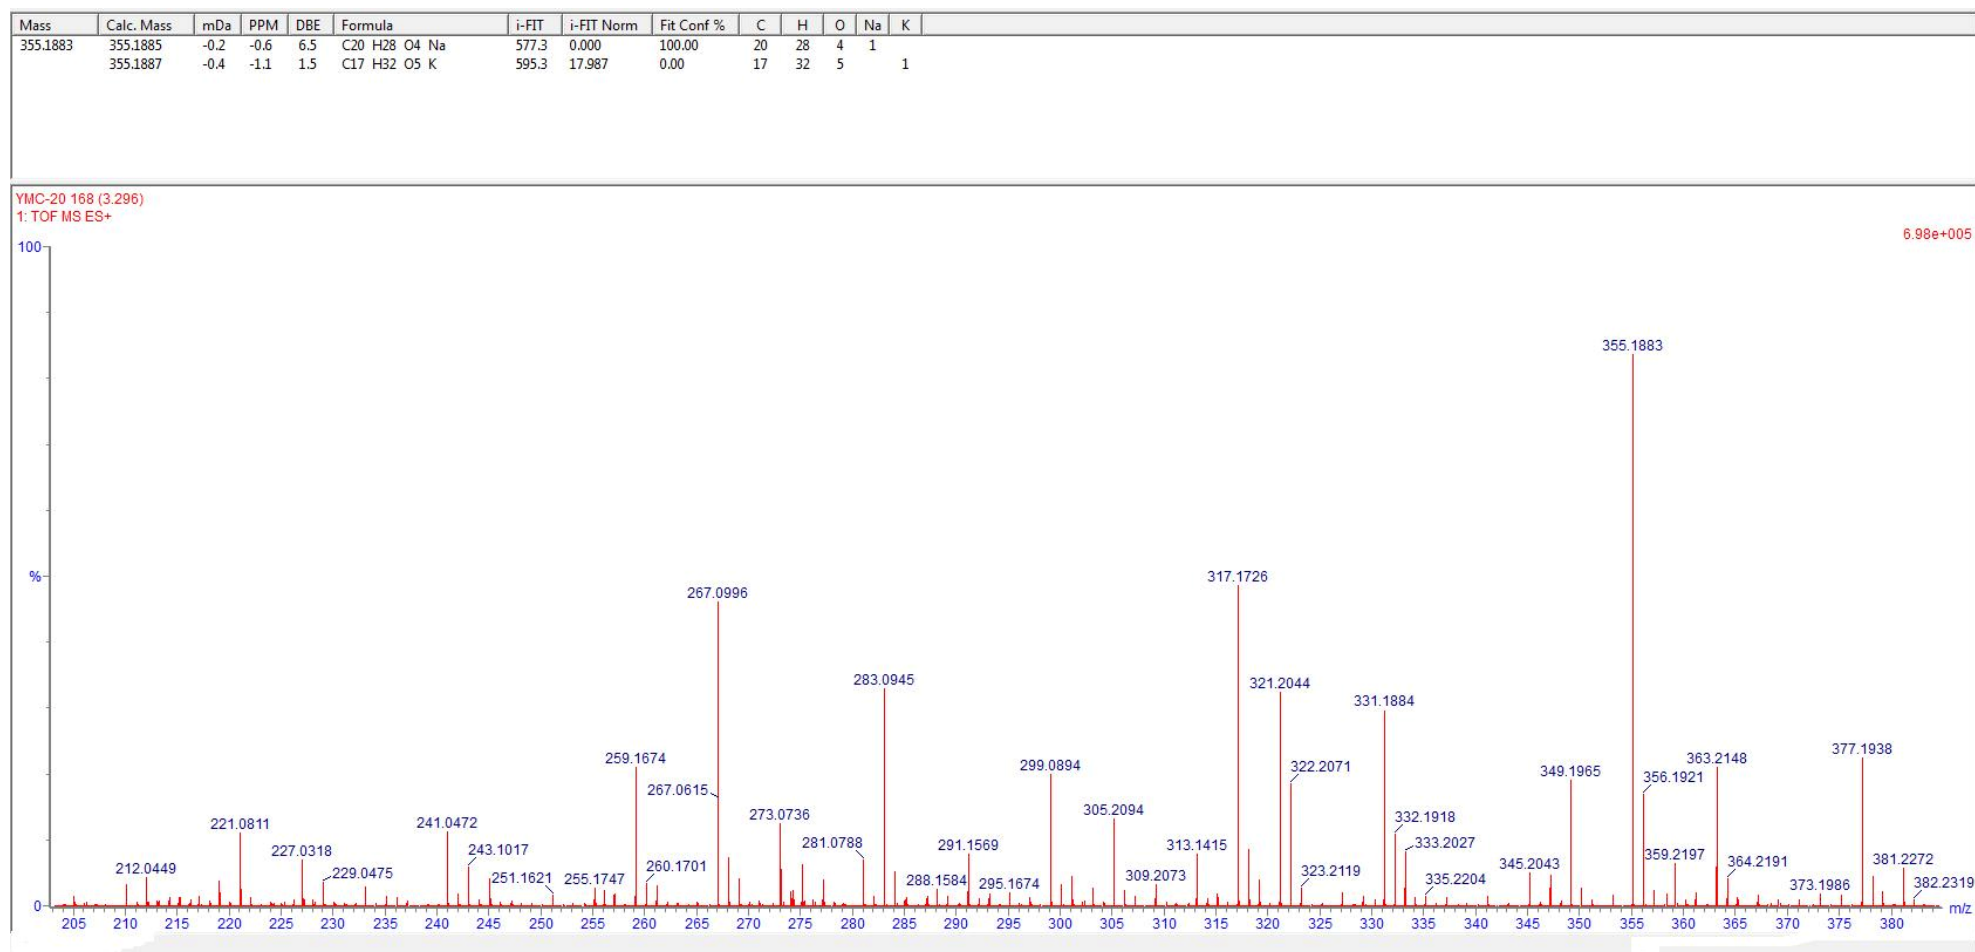

**Figure S3.** The  $^1\text{H}$ -NMR Spectrum of Compound **1** in  $\text{Me}_2\text{CO}-d_6$ .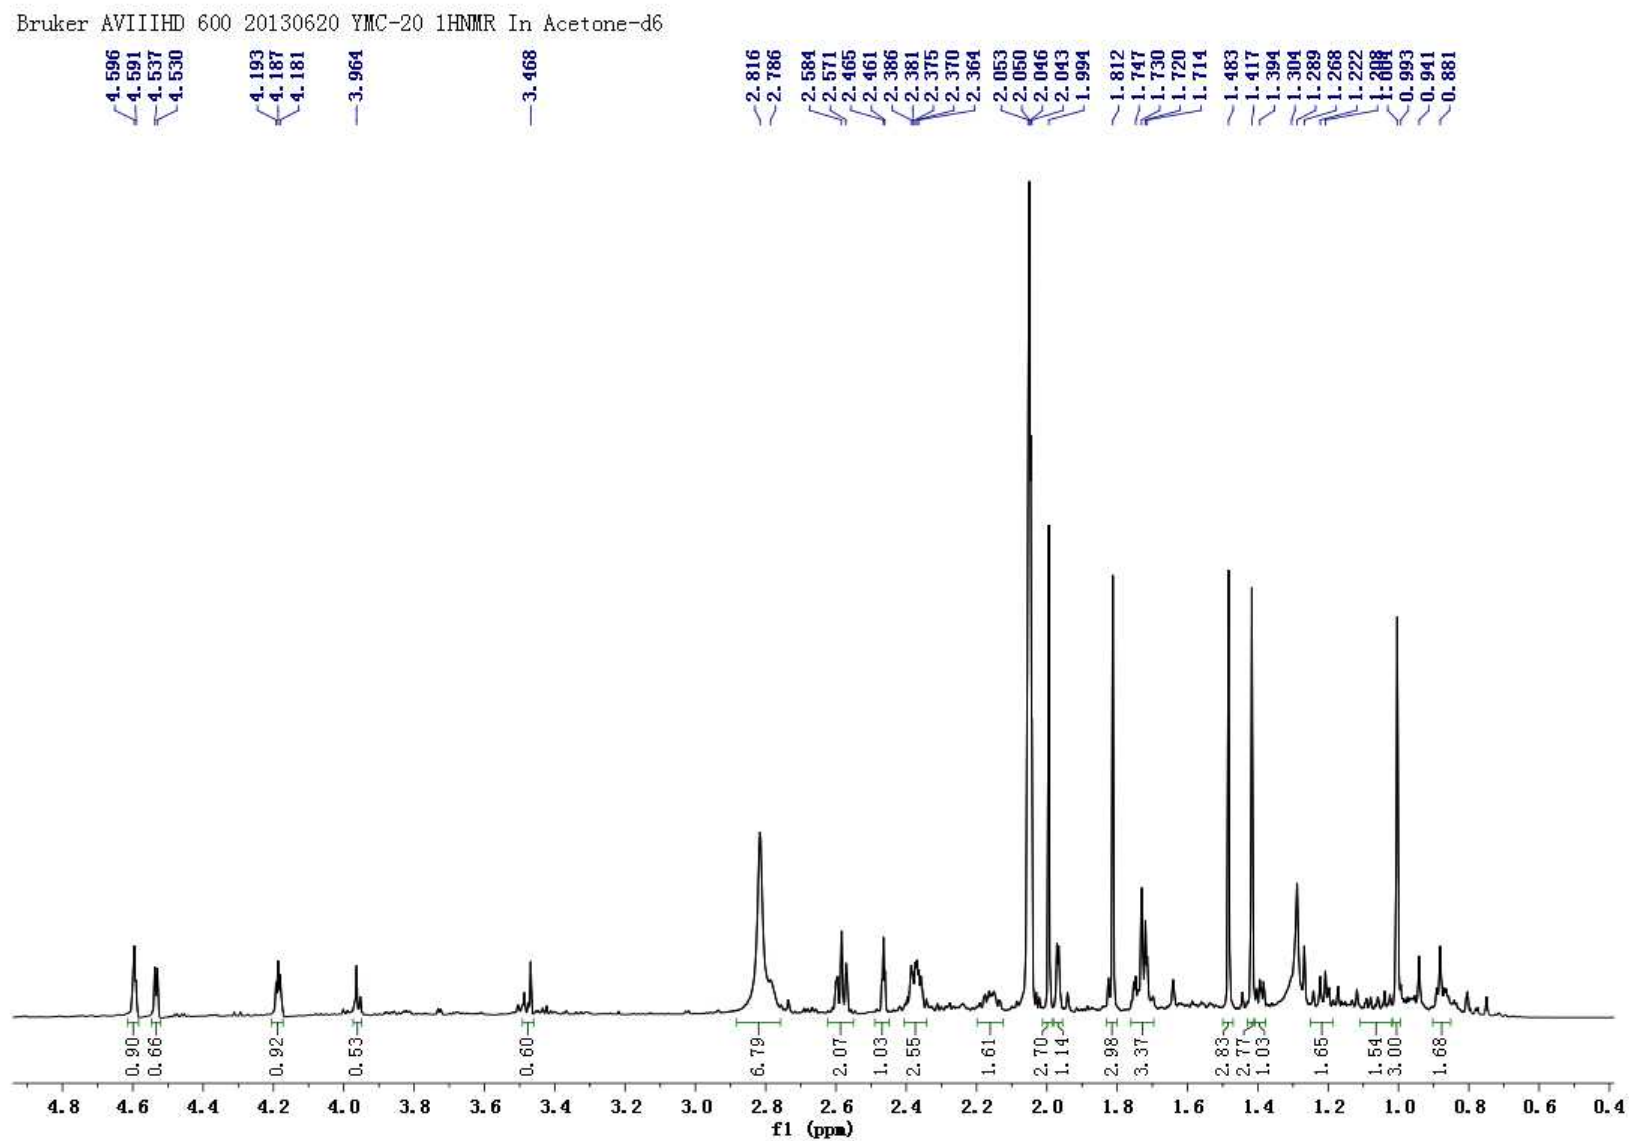

**Figure S4.** The  $^{13}\text{C}$ -NMR Spectrum of Compound **1** in  $\text{Me}_2\text{CO}-d_6$ .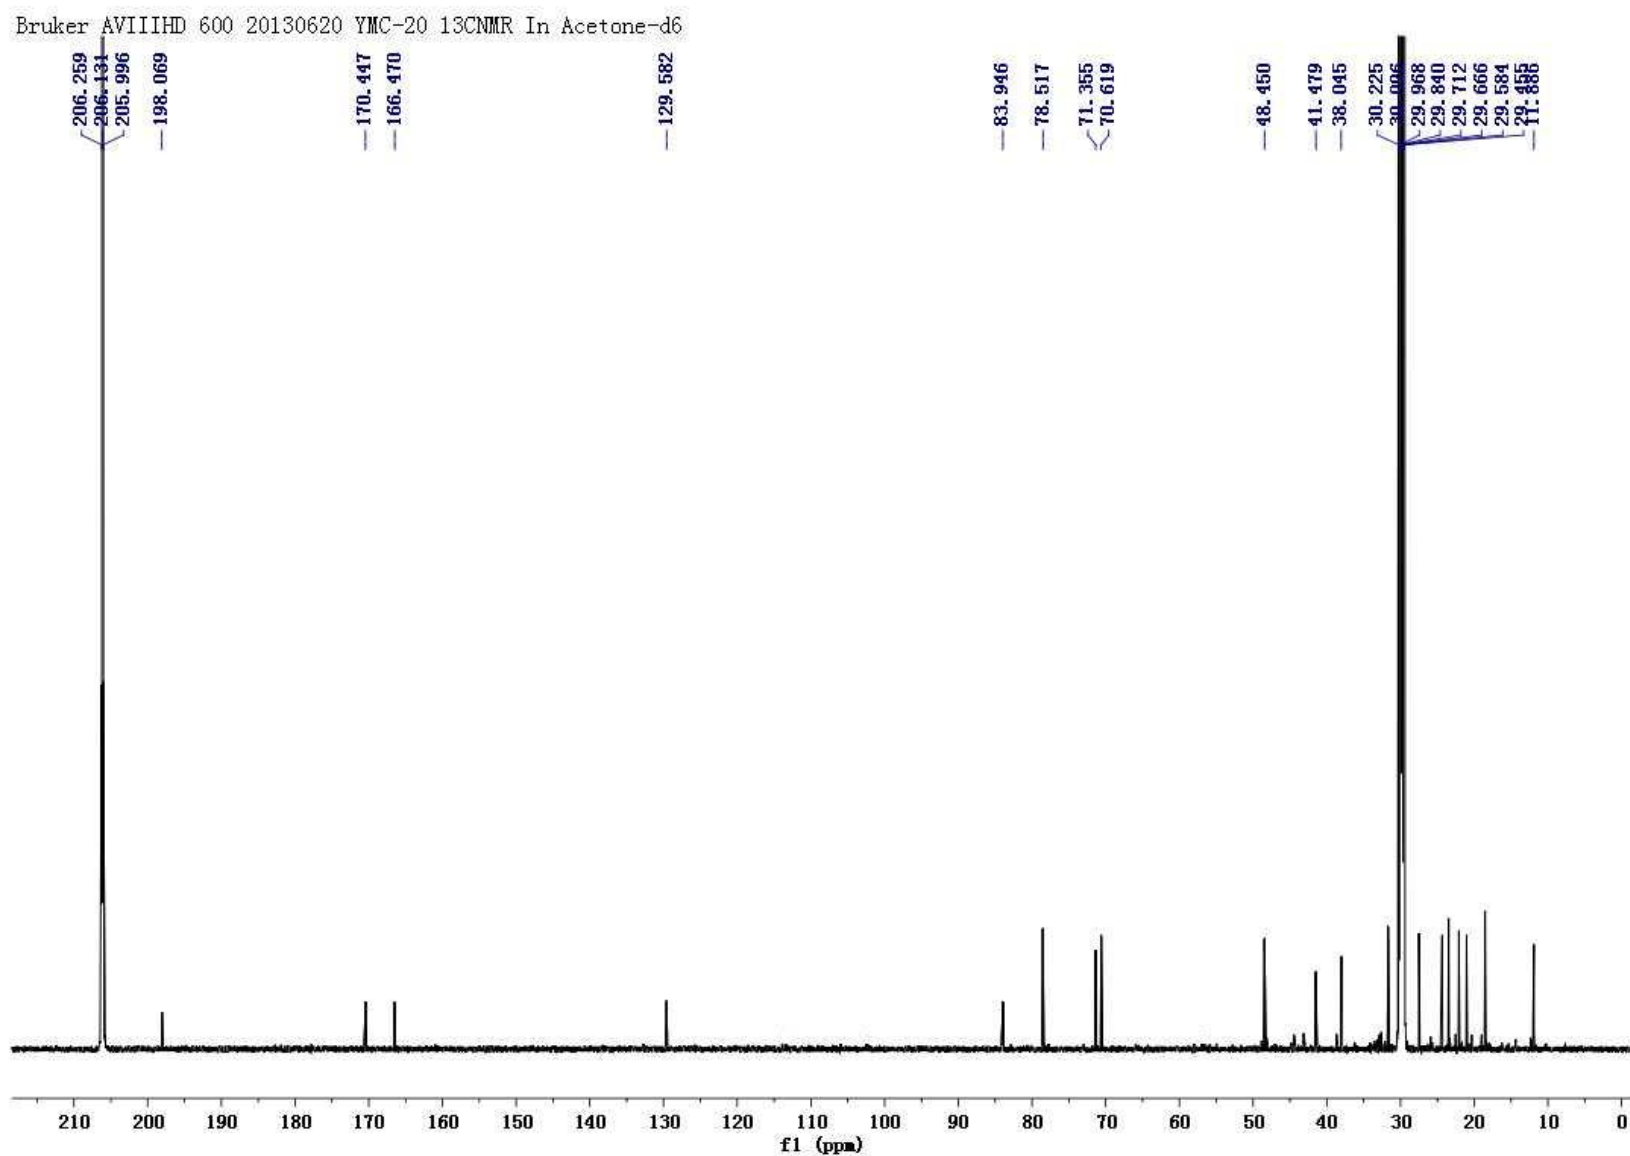

**Figure S5.** The DEPT Spectrum of Compound **1** in Me<sub>2</sub>CO-*d*<sub>6</sub>.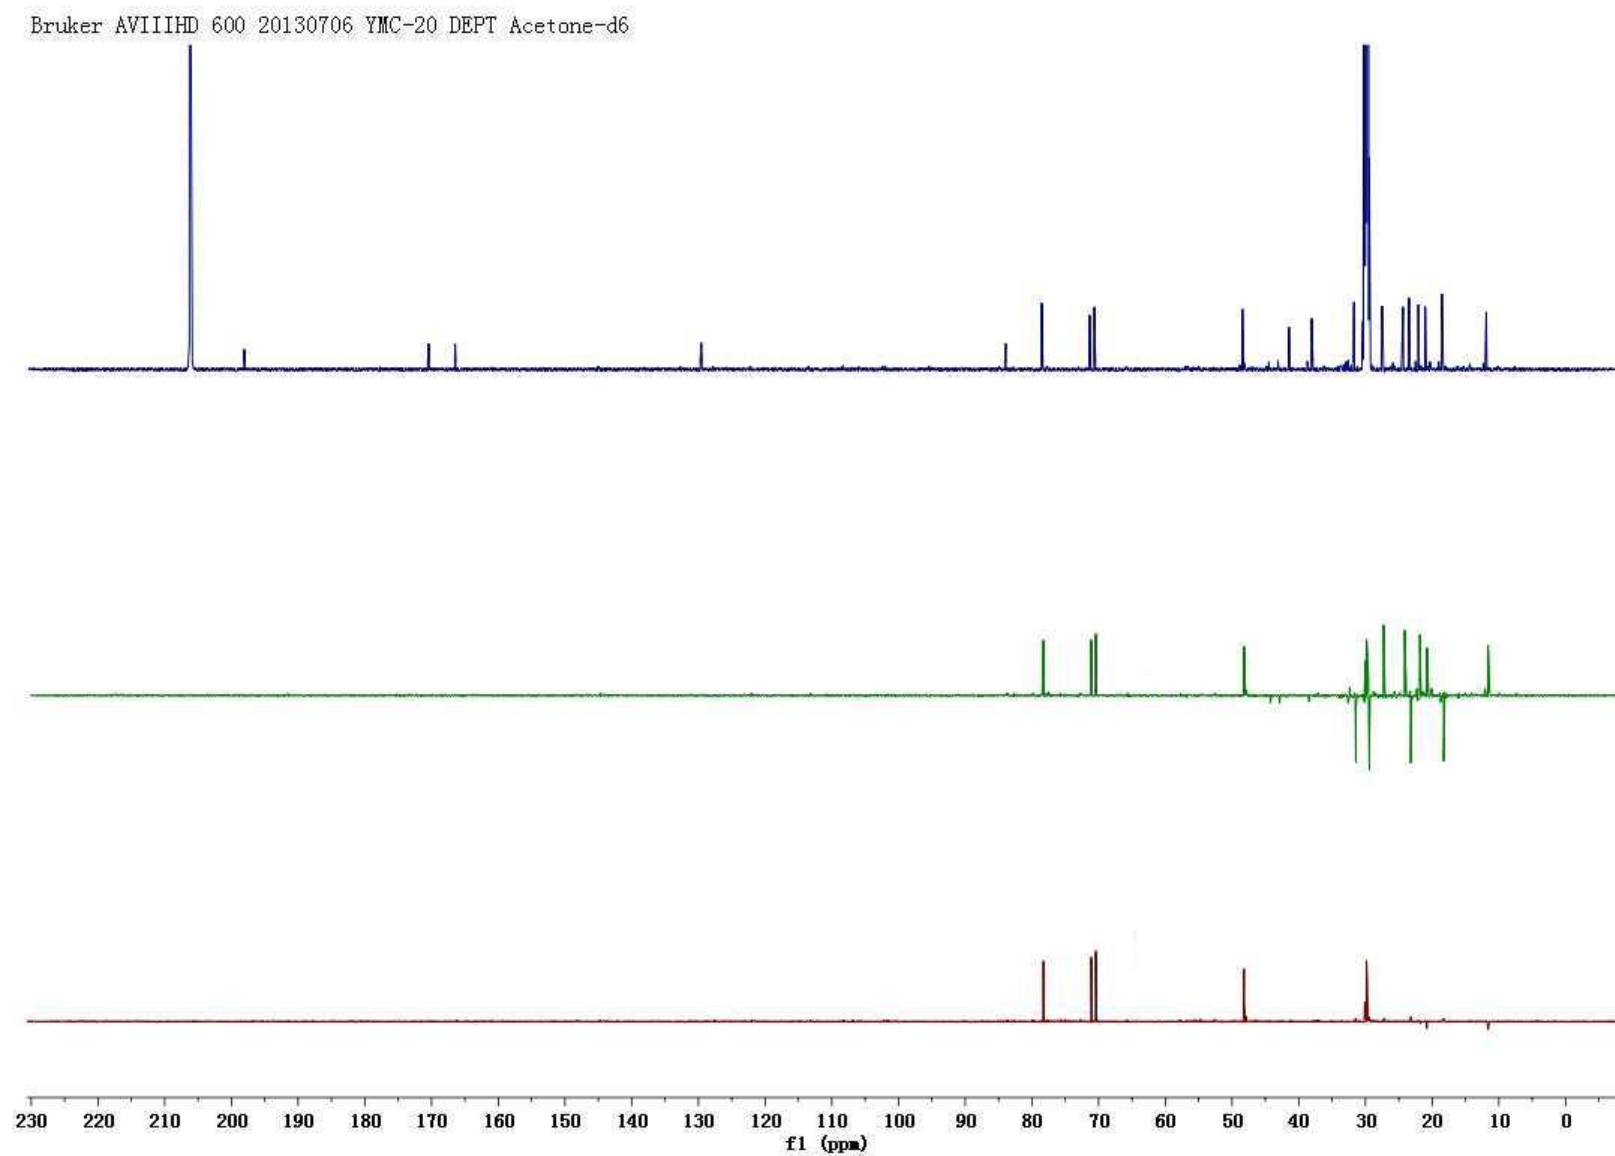

**Figure S6.** The HSQC Spectrum of Compound **1** in Me<sub>2</sub>CO-*d*<sub>6</sub>.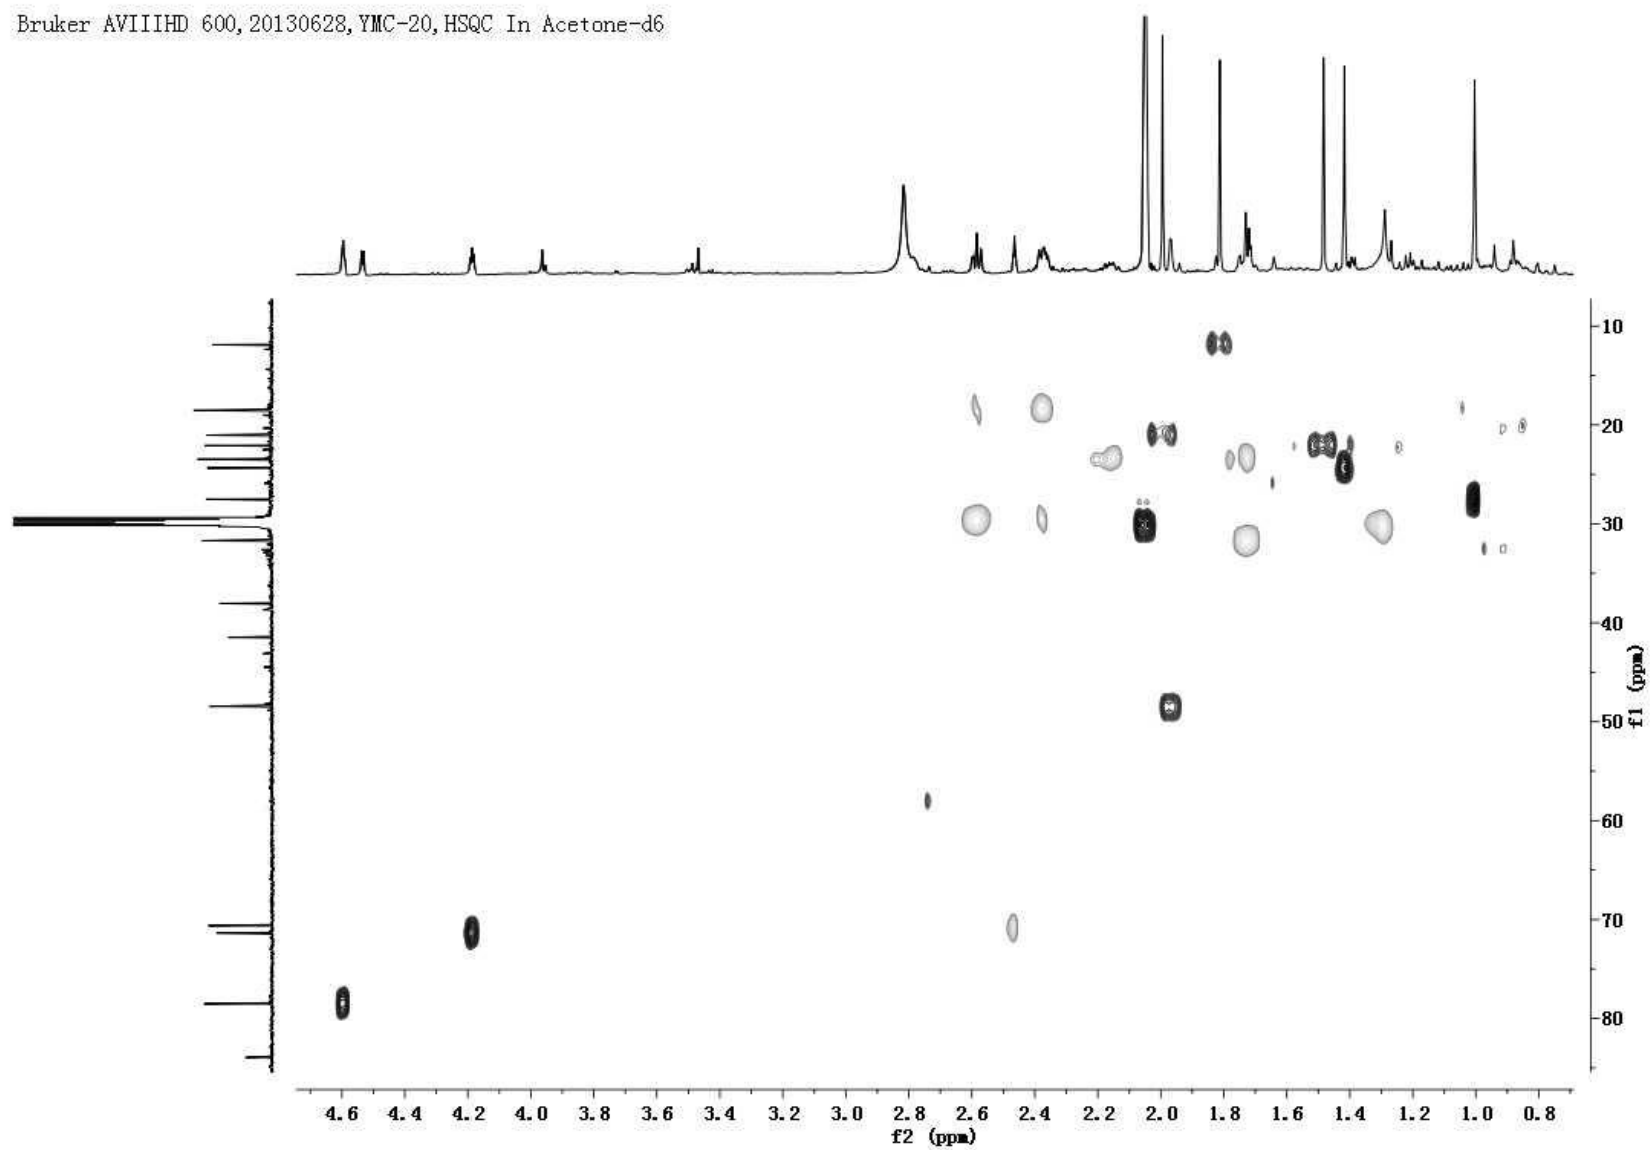

**Figure S7.** The  $^1\text{H}$ – $^1\text{H}$  gCOSY Spectrum of Compound **1** in  $\text{Me}_2\text{CO}-d_6$ .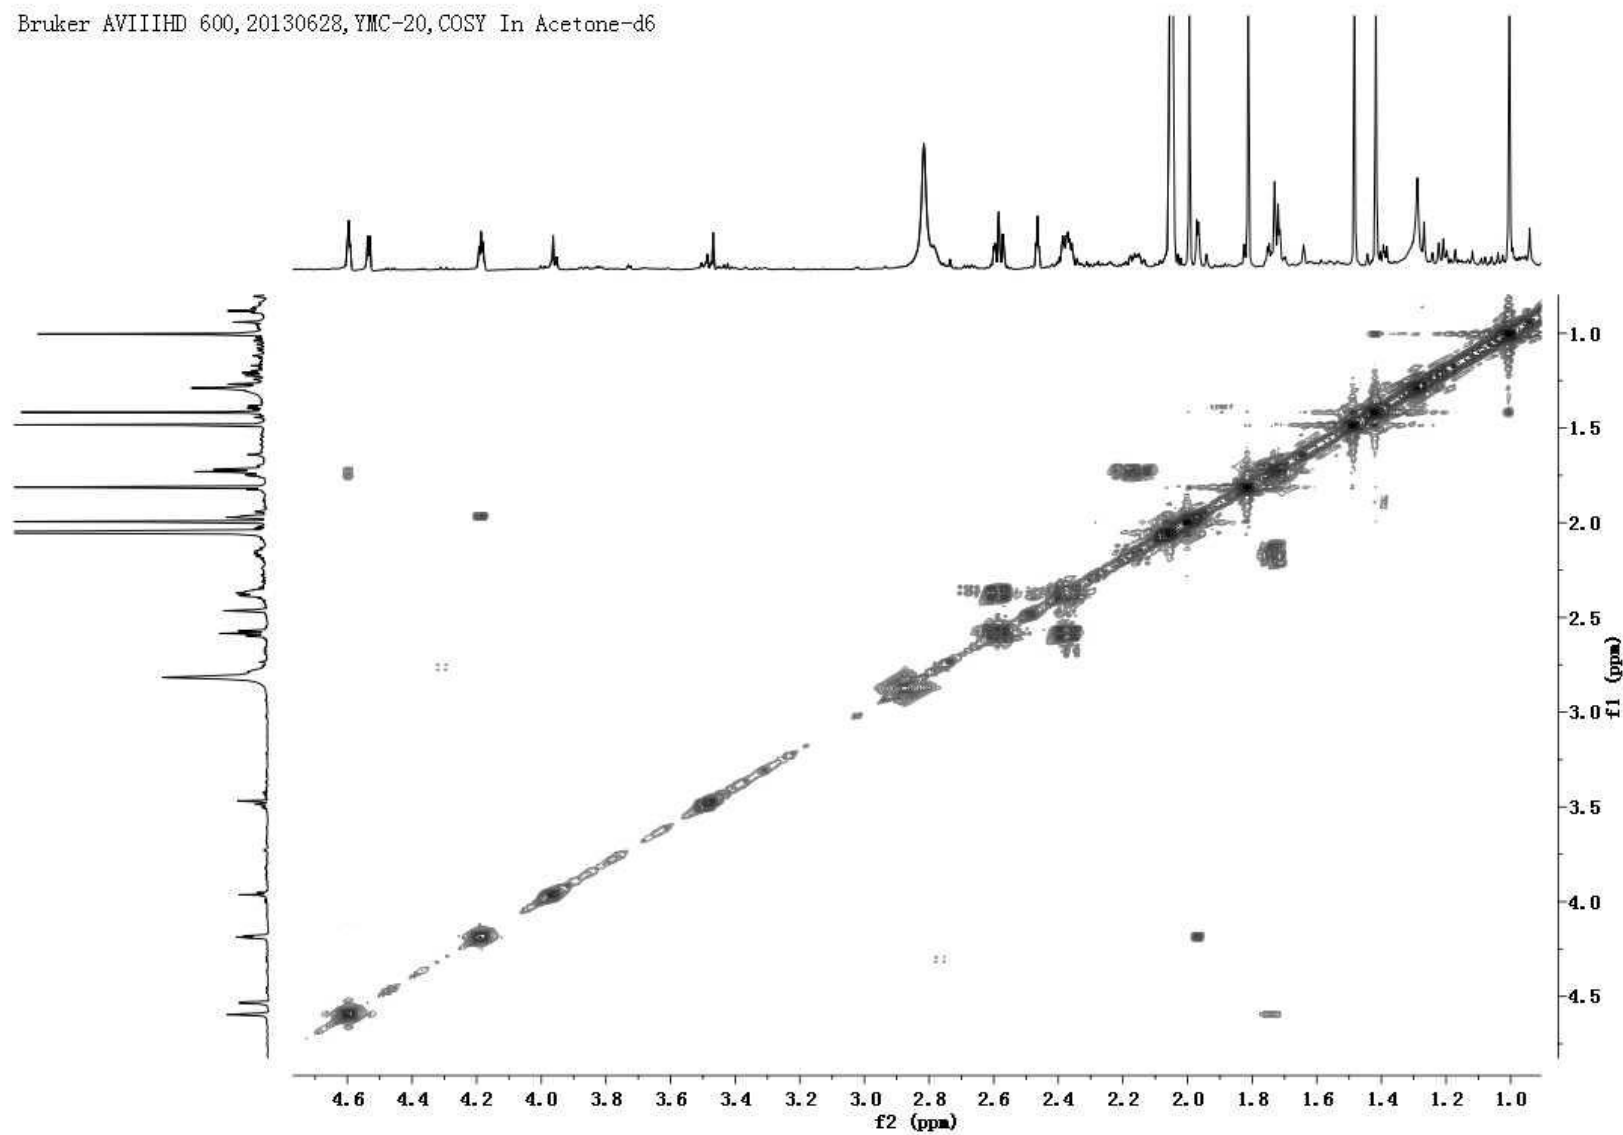



**Figure S8.** The HMBC Spectrum of Compound **1** in Me<sub>2</sub>CO-*d*<sub>6</sub>.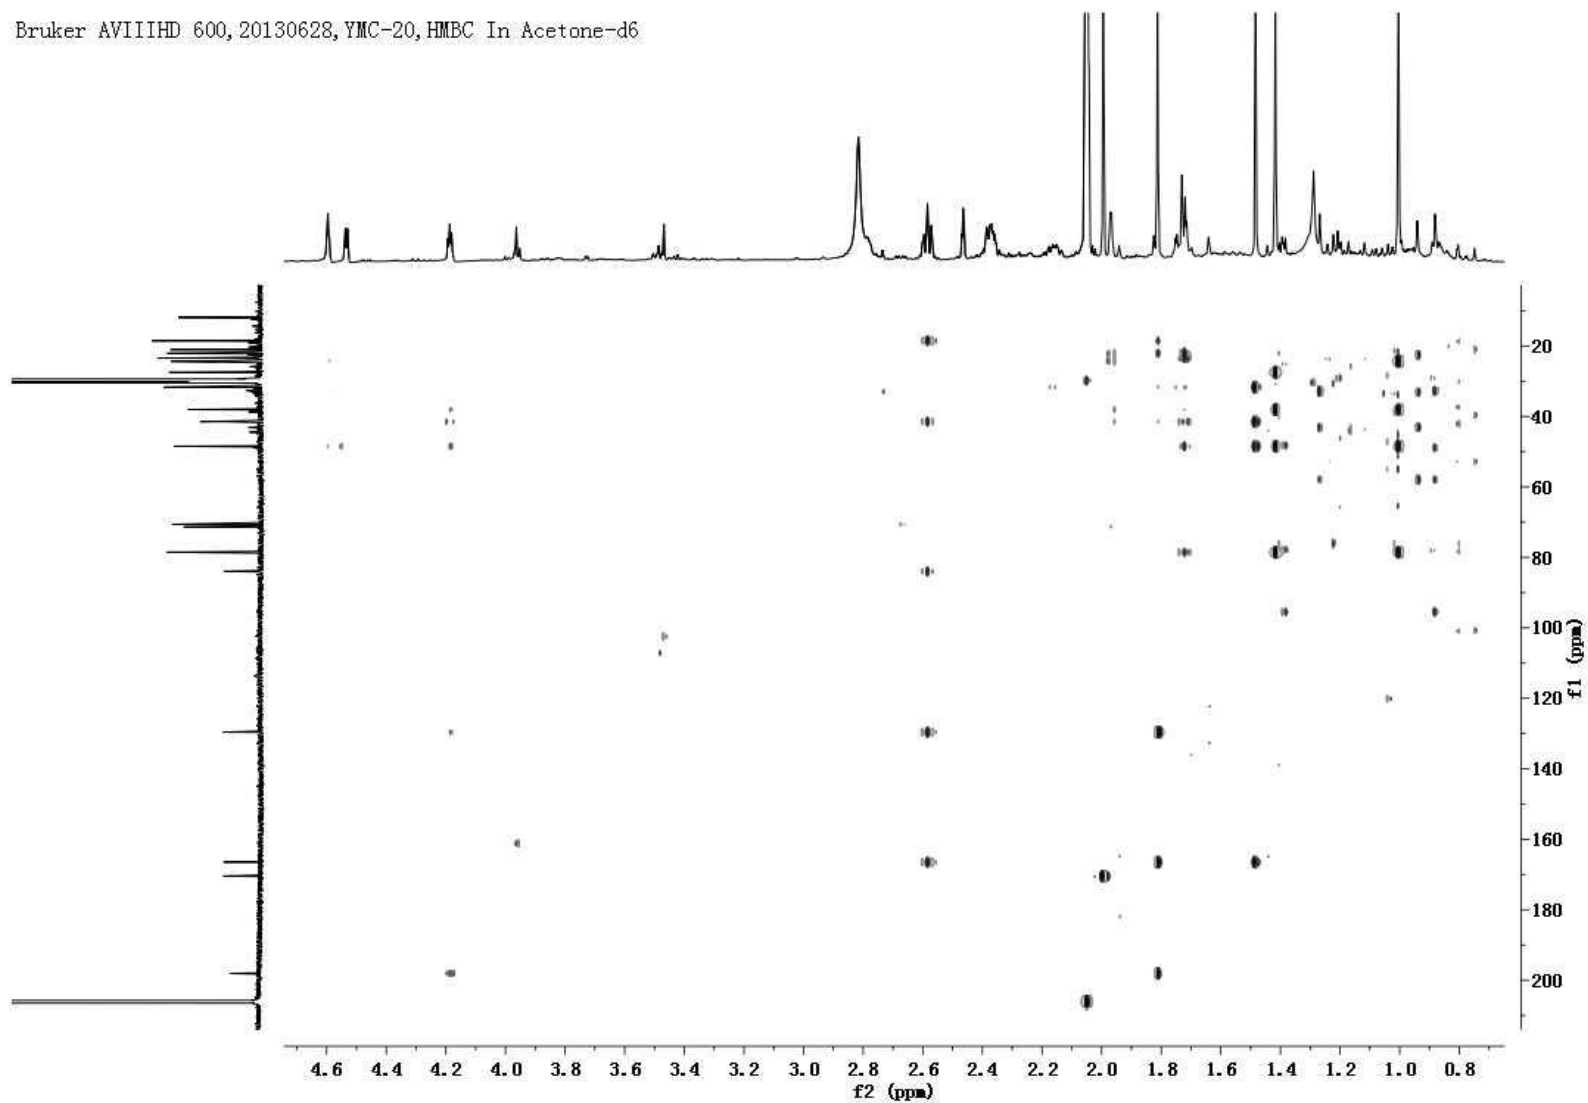

**Figure S9.** The NOESY Spectrum of Compound 1 in Me<sub>2</sub>CO-*d*<sub>6</sub>.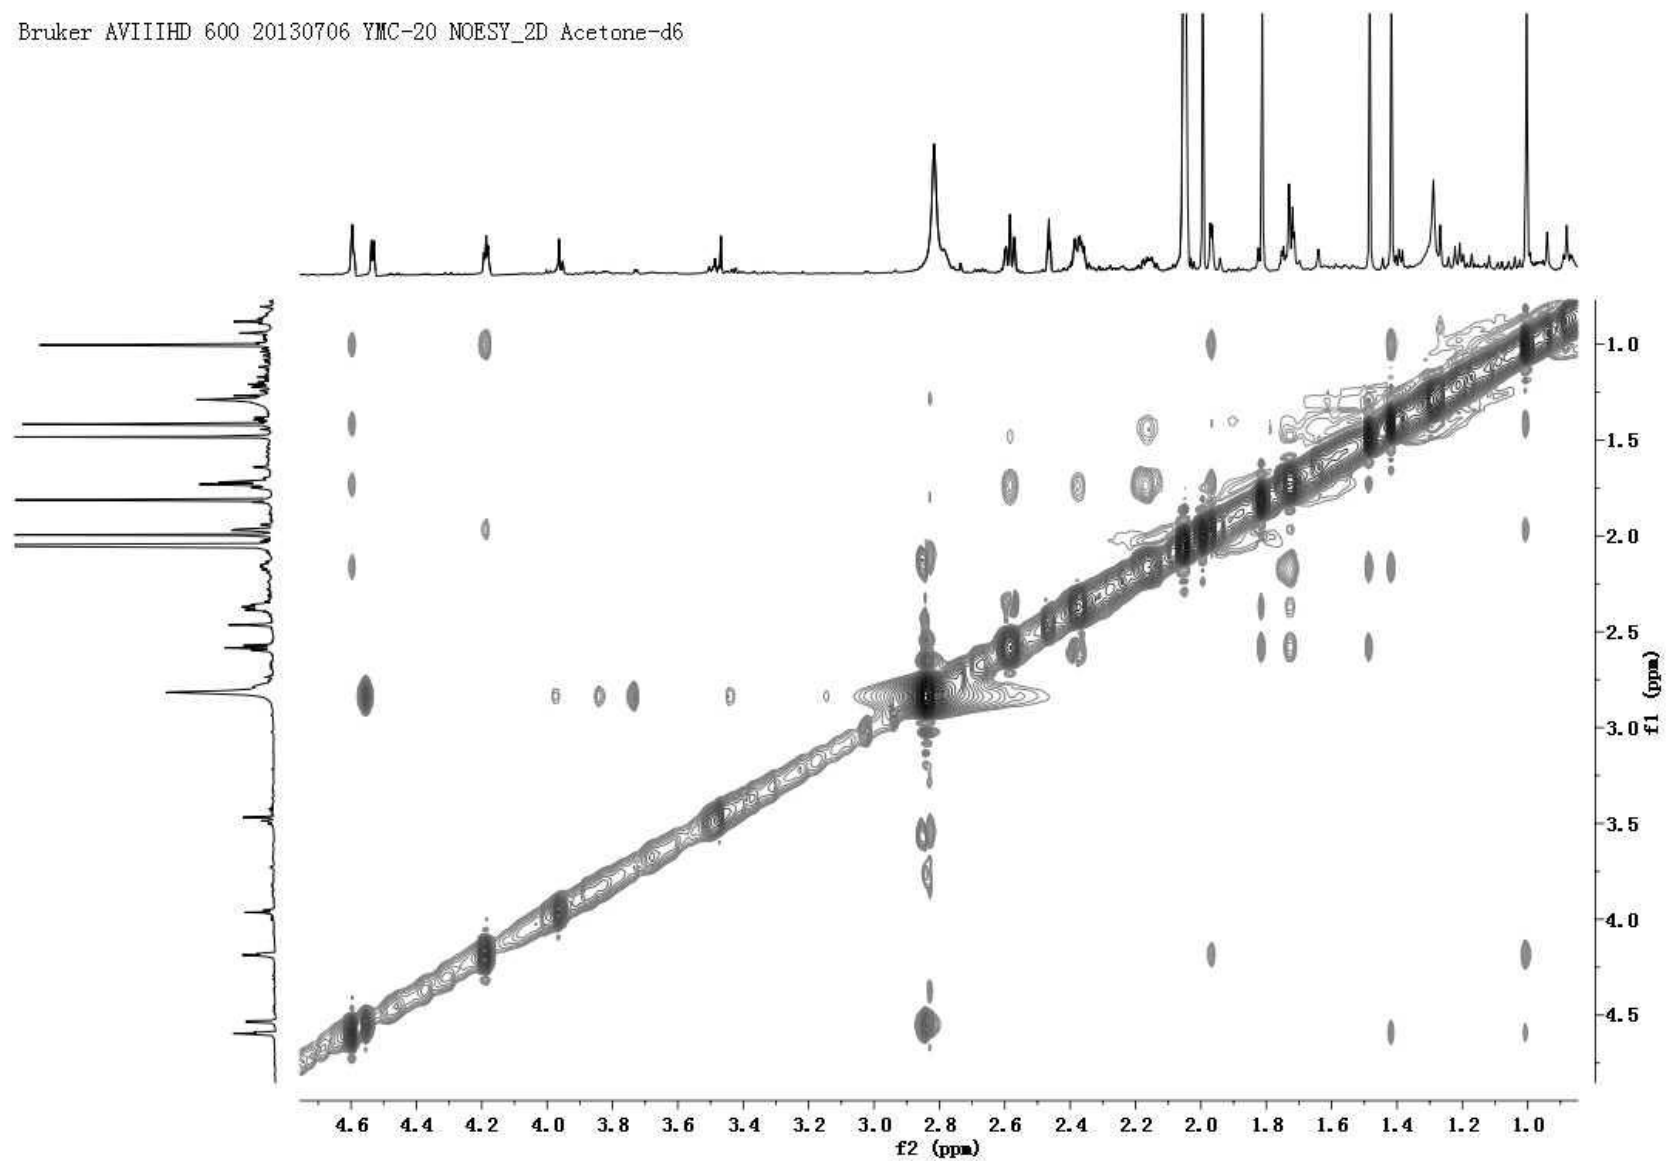

Supplement: s1 [file s1]
